# Supplementary material for: Effect of Puffing Behavior on Particle Size Distributions and Respiratory Depositions From Pod-Style Electronic Cigarette, or Vaping, Products
Source: PubMed Central journal article supplement (PMC8671759; doi:10.3389/fpubh.2021.750402), 2021-12-01
Supplement: Table_1.pdf [file Table_1.pdf]

# **Supplemental Material**

## **Effect of Puffing Behavior on Particle Size Distributions and Respiratory Depositions from Pod-style Electronic Cigarette, or Vaping, Products**

**Anand Ranpara\*, Aleksandr B. Stefaniak, Elizabeth Fernandez, Ryan F. LeBouf**

Respiratory Health Division, National Institute for Occupational Safety and Health,  
1095 Willowdale Road, Morgantown, WV, United States

**\* Correspondence: Ryan F. LeBouf, RLeBouf@cdc.gov**

**Keywords: E-cigarette, Pod-style E-cigarette, JUUL<sup>®</sup>, Particle size distributions, Respiratory deposition, Secondhand exposure estimates**

# Supplemental material

**Table S1: Mass median aerodynamic diameter (MMAD) and geometric standard deviation (GSD) for individual trials for puff profiles of reference e-liquid.**

| Puff profile | Power (W) | Puff Volume (mL) | Note                  | MMAD ( $\mu\text{m}$ ) | GSD  |
|--------------|-----------|------------------|-----------------------|------------------------|------|
| 1            | 6.5       | 55               |                       | 1.11                   | 1.63 |
| 1            | 6.5       | 55               |                       | 1.09                   | 1.59 |
| 1            | 6.5       | 55               |                       | 1.11                   | 1.59 |
| 2            | 6.5       | 65               |                       | 1.08                   | 1.58 |
| 2            | 6.5       | 65               |                       | 1.14                   | 1.60 |
| 2            | 6.5       | 65               |                       | 1.10                   | 1.58 |
| 3            | 6.5       | 75               |                       | 1.16                   | 1.62 |
| 3            | 6.5       | 75               |                       | 1.10                   | 1.58 |
| 3            | 6.5       | 75               |                       | 1.03                   | 1.49 |
| 4            | 7.5       | 55               |                       | 1.21                   | 1.69 |
| 4            | 7.5       | 55               |                       | 1.25                   | 1.71 |
| 4            | 7.5       | 55               |                       | 1.23                   | 1.71 |
| 4*           | 7.5       | 55               | Evaporative mass loss | 1.20                   | 1.67 |
| 4*           | 7.5       | 55               | Evaporative mass loss | 1.25                   | 1.71 |
| 4*           | 7.5       | 55               | Evaporative mass loss | 1.24                   | 1.71 |
| 5            | 7.5       | 65               |                       | 1.19                   | 1.65 |
| 5            | 7.5       | 65               |                       | 1.12                   | 1.63 |
| 5            | 7.5       | 65               |                       | 1.08                   | 1.62 |
| 5*           | 7.5       | 65               | Evaporative mass loss | 1.20                   | 1.65 |
| 5*           | 7.5       | 65               | Evaporative mass loss | 1.05                   | 1.54 |
| 5*           | 7.5       | 65               | Evaporative mass loss | 1.06                   | 1.55 |
| 6            | 7.5       | 75               |                       | 0.97                   | 1.37 |
| 6            | 7.5       | 75               |                       | 1.11                   | 1.58 |
| 6            | 7.5       | 75               |                       | 0.97                   | 1.40 |
| 6*           | 7.5       | 75               | Evaporative mass loss | 0.97                   | 1.38 |
| 6*           | 7.5       | 75               | Evaporative mass loss | 1.08                   | 1.55 |
| 6*           | 7.5       | 75               | Evaporative mass loss | 0.97                   | 1.35 |
